# Supplementary figures and images for: Persistence and effectiveness of the IL-12/23 pathway inhibitor ustekinumab or tumour necrosis factor inhibitor treatment in patients with psoriatic arthritis: 1-year results from the real-world PsABio Study
Source: HighWire-hosted journal article supplement (doi:10.1136/annrheumdis-2021-221640), 2022-02-24

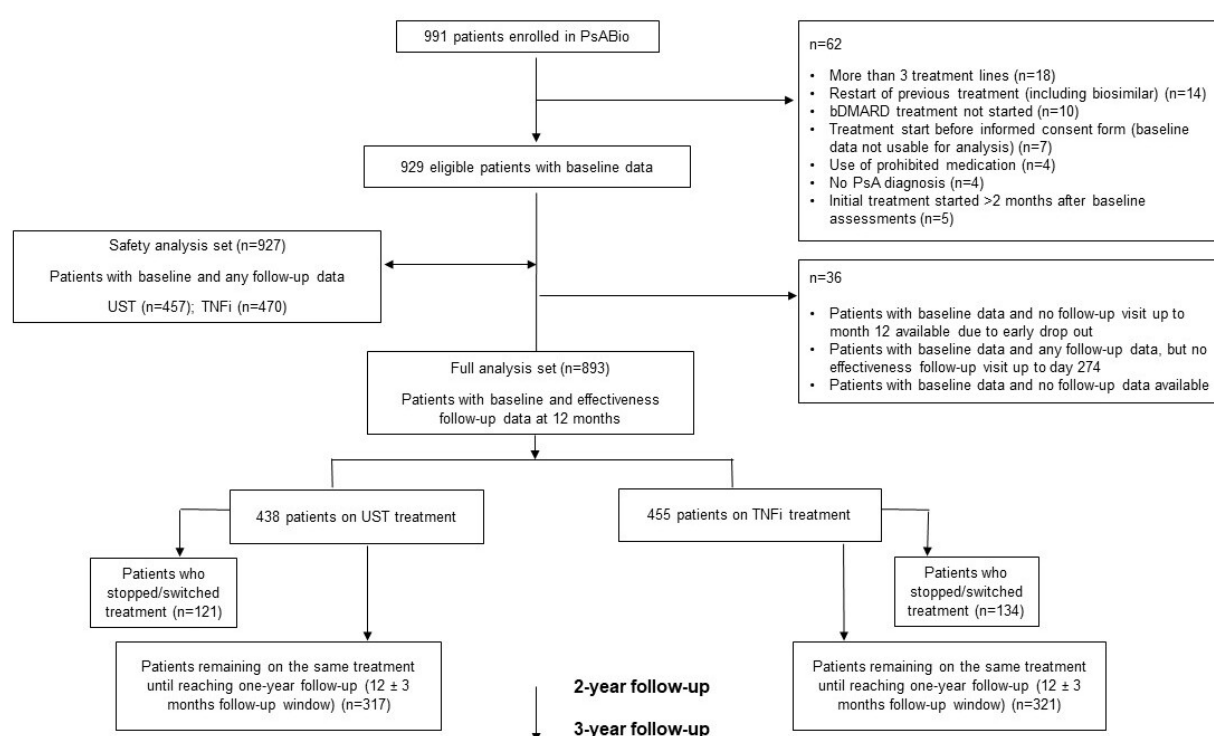

Supplement: annrheumdis-2021-221640supp001_data_supplement.pdf [file annrheumdis-2021-221640supp001_data_supplement.pdf]
